# Supplementary material for: Evidence of antimicrobial resistance-conferring genetic elements among pneumococci isolated prior to 1974
Source: PubMed Central journal article supplement (PMC3726389; doi:10.1186/1471-2164-14-500), 2013-07-24
Supplement: 1471-2164-14-500-S1.pdf [file 1471-2164-14-500-S1.pdf]

**Additional file 1 for “Evidence of antimicrobial resistance-conferring genetic elements among pneumococci isolated prior to 1974”**

**Kelly L. Wyres, Andries van Tonder, Lotte M Lambertsen, Regine Hakenbeck, Julian Parkhill, Stephen D. Bentley and Angela B. Brueggemann**

---

**Supplementary Table 1.**

**Genes identified in the phage-Tn916 composite element found in pneumococcal isolate 18C/3.**

| Gene <sup>a</sup>             | O <sup>b</sup> | Bp <sup>c</sup>  | Predicted Product                                  |
|-------------------------------|----------------|------------------|----------------------------------------------------|
| ICESp18C_3_00001              | R              | 957              | phage lytic amidase                                |
| ICESp18C_3_00002              | R              | 336              | phage holin, LL-H family                           |
| ICESp18C_3_00003              | R              | 300              | hypothetical protein                               |
| ICESp18C_3_00004              | R              | 351              | hypothetical protein                               |
| ICESp18C_3_00005              | R              | 204              | conserved domain protein                           |
| ICESp18C_3_00006              | R              | 117              | hypothetical protein                               |
| ICESp18C_3_00007              | R              | unk <sup>d</sup> | --                                                 |
| ICESp18C_3_00008              | R              | 351              | prophage protein                                   |
| ICESp18C_3_00009              | R              | 3606             | TMP repeat family                                  |
| ICESp18C_3_00010              | R              | 351              | hypothetical protein                               |
| ICESp18C_3_00011              | R              | 381              | prophage protein                                   |
| ICESp18C_3_00012              | R              | 414              | putative major tail protein                        |
| ICESp18C_3_00013              | R              | 369              | putative conserved structural protein              |
| ICESp18C_3_00014              | R              | 327              | hypothetical protein                               |
| ICESp18C_3_00015              | R              | 339              | hypothetical protein                               |
| ICESp18C_3_00016              | R              | 312              | hypothetical protein                               |
| ICESp18C_3_00017              | R              | 189              | hypothetical protein                               |
| ICESp18C_3_00018              | R              | 183              | hypothetical protein                               |
| ICESp18C_3_00019              | R              | 846              | major phage head protein                           |
| ICESp18C_3_00020              | R              | 585              | phage scaffold protein                             |
| ICESp18C_3_00021              | R              | 1349             | putative phage head morphogenesis protein          |
| ICESp18C_3_00022              | R              | 1302             | phage portal                                       |
| ICESp18C_3_00023              | R              | 1299             | phage terminase large subunit                      |
| ICESp18C_3_00024              | R              | 501              | phage terminase small subunit                      |
| ICESp18C_3_00025              | R              | 405              | phage protein                                      |
| ICESp18C_3_00026              | R              | 438              | hypothetical protein                               |
| ICESp18C_3_00027              | R              | 459              | hypothetical protein                               |
| ICESp18C_3_00028              | R              | 162              | hypothetical protein                               |
| ICESp18C_3_00029              | R              | 696              | hypothetical protein                               |
| ICESp18C_3_00030              | R              | 1344             | hypothetical protein                               |
| ICESp18C_3_00031              | R              | 822              | hypothetical protein                               |
| ICESp18C_3_00032              | R              | 507              | hypothetical protein                               |
| ICESp18C_3_00033              | R              | 828              | hypothetical protein                               |
| ICESp18C_3_00034              | R              | 318              | hypothetical protein                               |
| ICESp18C_3_00035 <sup>e</sup> | F              | 120              | hypothetical protein                               |
| ICESp18C_3_00036 <sup>e</sup> | F              | 315              | conjugative transposon protein                     |
| ICESp18C_3_00037 <sup>e</sup> | F              | 384              | conjugative transposon protein                     |
| ICESp18C_3_00038 <sup>e</sup> | F              | 1386             | conjugative transposon FtsK/SpoIIIE-family protein |

|                               |   |      |                                                                |
|-------------------------------|---|------|----------------------------------------------------------------|
| ICESp18C_3_00039 <sup>e</sup> | F | 186  | conjugative transposon FtsK/SpoIIIE-family                     |
| ICESp18C_3_00040 <sup>e</sup> | F | 1206 | putative conjugative transposon replication initiation factor  |
| ICESp18C_3_00041 <sup>e</sup> | F | 222  | conjugative transposon protein                                 |
| ICESp18C_3_00042 <sup>e</sup> | F | 498  | conjugative transposon protein                                 |
| ICESp18C_3_00043 <sup>e</sup> | F | 231  | putative conjugative transposon membrane protein               |
| ICESp18C_3_00044 <sup>e</sup> | F | 2448 | conjugative transposon ATP/GTP-binding protein                 |
| ICESp18C_3_00045 <sup>e</sup> | F | 2178 | conjugative transposon membrane protein                        |
| ICESp18C_3_00046 <sup>e</sup> | F | 1002 | putative cell wall hydrolase                                   |
| ICESp18C_3_00047 <sup>e</sup> | F | 915  | putative conjugative transposon exported protein               |
| <i>tet(M)</i> <sup>e</sup>    | F | 1920 | conjugative transposon tetracycline resistance protein, tet(M) |
| ICESp18C_3_00049 <sup>e</sup> | R | 354  | putative conjugative transposon regulatory protein             |
| ICESp18C_3_00050 <sup>e</sup> | F | 147  | hypothetical protein                                           |
| ICESp18C_3_00051 <sup>e</sup> | F | 423  | putative conjugative transposon regulatory protein             |
| ICESp18C_3_00052 <sup>e</sup> | F | 231  | hypothetical protein                                           |
| ICESp18C_3_00053 <sup>e</sup> | R | 129  | hypothetical protein                                           |
| ICESp18C_3_00054 <sup>e</sup> | R | 252  | hypothetical protein                                           |
| <i>xis</i> <sup>e</sup>       | F | 204  | excisionase                                                    |
| <i>int</i> <sup>e</sup>       | F | 1218 | integrase                                                      |
| ICESp18C_3_00057              | R | 1203 | hypothetical protein                                           |
| ICESp18C_3_00058              | R | 486  | hypothetical protein                                           |
| ICESp18C_3_00059              | R | 360  | hypothetical protein                                           |
| ICESp18C_3_00060              | R | 483  | hypothetical protein                                           |
| ICESp18C_3_00061              | R | 765  | hypothetical protein                                           |
| ICESp18C_3_00062              | R | 231  | hypothetical protein                                           |
| ICESp18C_3_00063              | R | 342  | hypothetical protein                                           |
| ICESp18C_3_00064              | F | 240  | hypothetical protein                                           |
| ICESp18C_3_00065              | R | 171  | hypothetical protein                                           |
| ICESp18C_3_00066              | R | 204  | hypothetical protein                                           |
| ICESp18C_3_00067              | F | 690  | hypothetical protein                                           |
| ICESp18C_3_00068              | F | 792  | hypothetical protein                                           |
| ICESp18C_3_00069              | F | 951  | hypothetical protein                                           |
| <i>int</i>                    | F | 1128 | phage integrase                                                |

- a. Genes listed in order from left to right as depicted in Figure 1.  
b. Orientation of the gene: F, forward; R, reverse.  
c. Bp: gene length in base pairs.  
d. Precise length of the sequence gap is unknown.  
e Tn916-associated region.

**Supplementary Table 2.****Genes identified in the novel ICE element, ICESpPN1, which was found in the pneumococcal isolate PN1.**

| Gene <sup>a</sup> | O <sup>b</sup> | Bp <sup>c</sup> | Predicted Product                                                    |
|-------------------|----------------|-----------------|----------------------------------------------------------------------|
| PN1_ICE_00001     | F              | 174             | hypothetical protein                                                 |
| <i>repA</i>       | F              | 780             | replication initiation protein A, RepA                               |
| PN1_ICE_00003     | F              | 102             | hypothetical protein                                                 |
| PN1_ICE_00004     | F              | 1359            | putative DNA methylase                                               |
| PN1_ICE_00005     | F              | 450             | hypothetical protein                                                 |
| PN1_ICE_00006     | F              | 381             | arsenate reductase-like glutaredoxin family protein                  |
| PN1_ICE_00007     | F              | 234             | hypothetical protein                                                 |
| PN1_ICE_00008     | F              | 663             | putative caax amino protease family protein                          |
| PN1_ICE_00009     | F              | 591             | hypothetical protein                                                 |
| PN1_ICE_00010     | F              | 810             | hypothetical protein                                                 |
| PN1_ICE_00011     | F              | 729             | truncated traD/traG family protein                                   |
| PN1_ICE_00012     | F              | 243             | hypothetical protein                                                 |
| PN1_ICE_00013     | F              | 855             | putative membrane protein                                            |
| PN1_ICE_00014     | F              | 360             | hypothetical protein                                                 |
| PN1_ICE_00015     | F              | 2358            | hypothetical protein                                                 |
| PN1_ICE_00016     | F              | 2814            | M23 peptidase domain protein                                         |
| PN1_ICE_00017     | R              | 609             | hypothetical protein pseudogene                                      |
| PN1_ICE_00018     | R              | 165             | hypothetical protein                                                 |
| PN1_ICE_00019     | F              | 411             | Ig domain protein, 2 domain protein                                  |
| PN1_ICE_00020     | F              | 6225            | putative conjugative transposon DNA recombination protein pseudogene |
| PN1_ICE_00021     | F              | 285             | hypothetical protein                                                 |
| PN1_ICE_00022     | F              | 300             | hypothetical protein                                                 |
| PN1_ICE_00023     | F              | 183             | hypothetical protein                                                 |
| PN1_ICE_00024     | F              | 183             | hypothetical protein                                                 |
| PN1_ICE_00025     | F              | 177             | hypothetical protein                                                 |
| PN1_ICE_00026     | F              | 108             | hypothetical protein                                                 |
| PN1_ICE_00027     | F              | 738             | ABC-type antimicrobial peptide transport protein                     |
| PN1_ICE_00028     | F              | 2016            | ABC transporter permease                                             |
| PN1_ICE_00029     | F              | 1575            | histidine kinase                                                     |
| PN1_ICE_00030     | F              | 597             | response regulator                                                   |
| PN1_ICE_00031     | F              | 2955            | putative lantibiotic biosynthesis protein                            |
| PN1_ICE_00032     | F              | 2124            | putative lantibiotic transporter protein                             |
| PN1_ICE_00033     | F              | 642             | putative parvulin-like peptidyl-prolyl isomerase                     |
| PN1_ICE_00034     | F              | 498             | hypothetical protein                                                 |
| <i>plcR</i>       | F              | 867             | putative transcriptional regulator, PlcR                             |
| PN1_ICE_00036     | F              | 135             | hypothetical protein                                                 |
| PN1_ICE_00037     | F              | 252             | hypothetical protein                                                 |
| PN1_ICE_00038     | F              | 303             | hypothetical protein                                                 |
| PN1_ICE_00039     | F              | 1347            | putative protein kinase                                              |
| PN1_ICE_00040     | F              | 918             | ABC transporter, ATP-binding protein                                 |
| PN1_ICE_00041     | F              | 801             | putative ABC-2 transporter permease protein                          |
| PN1_ICE_00042     | F              | 474             | transposase, IS200 family                                            |
| PN1_ICE_00043     | F              | 222             | hypothetical protein                                                 |
| PN1_ICE_00044     | F              | 270             | putative excisionase                                                 |

PN1\_ICE\_00045      F      1509      putative integrase

---

- a. Genes listed in order from left to right as depicted in Figure 1.
- b. Orientation of the gene: F, forward; R, reverse.
- c. Bp: gene length in base pairs.
